# Supplementary material for: Comparing amikacin and kanamycin-induced hearing loss in multidrug-resistant tuberculosis treatment under programmatic conditions in a Namibian retrospective cohort
Source: PubMed Central journal article supplement (PMC4675035; doi:10.1186/s40360-015-0036-7), 2015-12-10
Supplement: 40360_2015_36_MOESM1_ESM.pdf [file 40360_2015_36_MOESM1_ESM.pdf]

**MINISTRY OF HEALTH AND SOCIAL SERVICES**

EAR, NOSE AND THROAT DEPARTMENT

**AUDIOLOGICAL ASSESSMENT**

SURNAME & INITIALS: .....

DATE OF BIRTH: .....

GENDER: ..... WARD/DEPT .....

ADDRESS/SCHOOL: ..... TEST RELIABILITY

TELEPHONE: ..... DATE: ..... Good .....

REFERRED BY: ..... TESTER: ..... Fair .....

AUDIOMETER: ..... NO. OF TEST: ..... Poor .....

BACKGROUND INFORMATION: .....

**PURE TONE AUDIOGRAM**

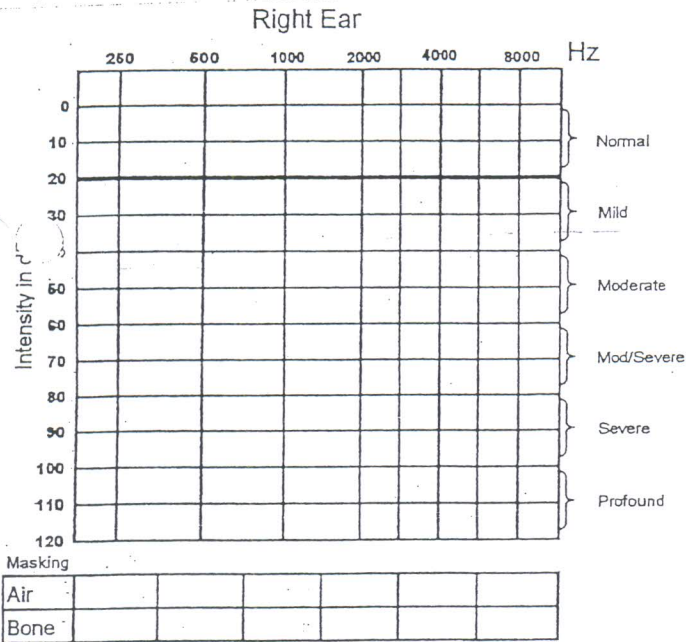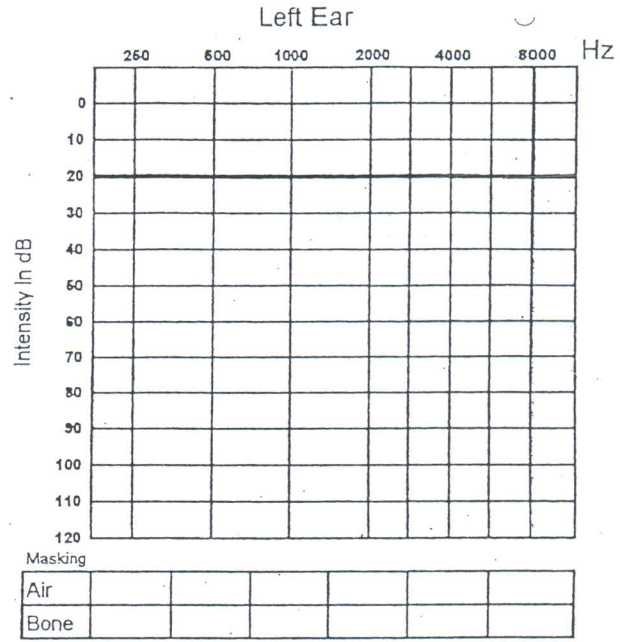

% Hearing loss (ISO) Right ..... % Left ..... % Binaural ..... % Type of loss: .....

**WEBER**

|     |     |      |      |      |
|-----|-----|------|------|------|
| 250 | 500 | 1000 | 2000 | 4000 |
|     |     |      |      |      |

**TYMPANOGRAM**

|       |      |       |            |               |
|-------|------|-------|------------|---------------|
|       | Type | M E P | Compliance | Ear canal vol |
| Right |      |       |            |               |
| Left  |      |       |            |               |

**SPEECH AUDIOGRAM Intensity dB**

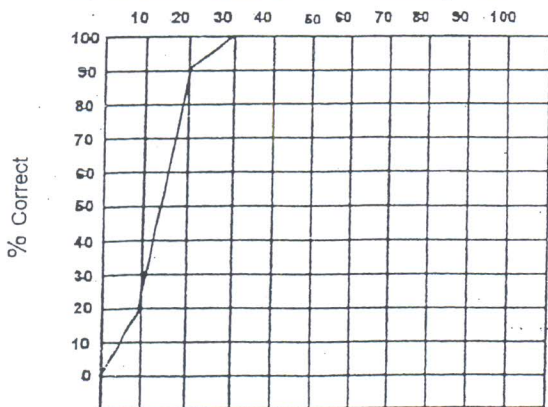

**HEARING AID EVALUATION**

|  |                  |   |   |
|--|------------------|---|---|
|  | TYPE             |   |   |
|  | EAR              |   |   |
|  | Aid - Lipreading | % | % |
|  | Aid + Lipreading | % | % |
|  | F.F - Lipreading | % | % |
|  | F.F + Lipreading | % | % |

|               |     |   |
|---------------|-----|---|
|               | KEY |   |
|               | R   | L |
| Air cond.     | ○   | × |
| Bone cond.    | ∧   | ∨ |
| Masked        | △   | ▽ |
| No response   | ↙   | ↘ |
| Contra reflex | ⊗   | ⊗ |
| Ipsi reflex   | □   | □ |

REMARKS: .....

|       |     |     |                     |
|-------|-----|-----|---------------------|
| EAR   | PTT | SRT | Max. discrimination |
| LEFT  |     |     |                     |
| RIGHT |     |     |                     |
